# Supplementary material for: Harnessing point-defect induced local symmetry breaking in a tetragonal-HfO2 system through sterically mismatched ion doping
Source: Royal Society of Chemistry journal article supplement (doi:10.1039/d3tc03566b), 2024-01-01
Supplement: d3tc03566b1.pdf [file d3tc03566b1.pdf]

## Supporting Information

### **Harnessing Point-defect Induced Local Symmetry Breaking in the Tetragonal-HfO<sub>2</sub> System through Sterically Mismatched Ion Doping**

Syed Ul Hasnain Bakhtiar <sup>a</sup>, Pu Ai <sup>a</sup>, Harse Sattar <sup>a</sup>, Sharafat Ali <sup>b</sup>, Ahmed Sadeq Al-Fatesh <sup>c</sup>,  
Junlei Zhao <sup>d\*</sup>, Wen Dong <sup>a,e\*</sup>, Qiuyun Fu <sup>a,e\*</sup>

<sup>a</sup> School of Integrated Circuits, Research Centre & Wuhan National Lab for Optoelectronics & Optical Valley  
Laboratory Huazhong University of Science and Technology Wuhan 430074, China

<sup>b</sup> School of Physics, University of Electronic Science and Technology of China, Chengdu, 610054, China

<sup>c</sup> Chemical Engineering Department, College of Engineering, King Saud University, P.O. Box 800, Riyadh 11421,  
Saudi Arabia

<sup>d</sup> Department of Electrical and Electronic Engineering, Southern University of Science and Technology, Shenzhen,  
518055, China

<sup>e</sup> Shenzhen Huazhong University of Science and Technology Research Institute, Shenzhen 518000, P. R. China

Correspondence: [zhaojl@sustech.edu.cn](mailto:zhaojl@sustech.edu.cn); [dongw@hust.edu.cn](mailto:dongw@hust.edu.cn); [fuqy@mail.hust.edu.cn](mailto:fuqy@mail.hust.edu.cn);

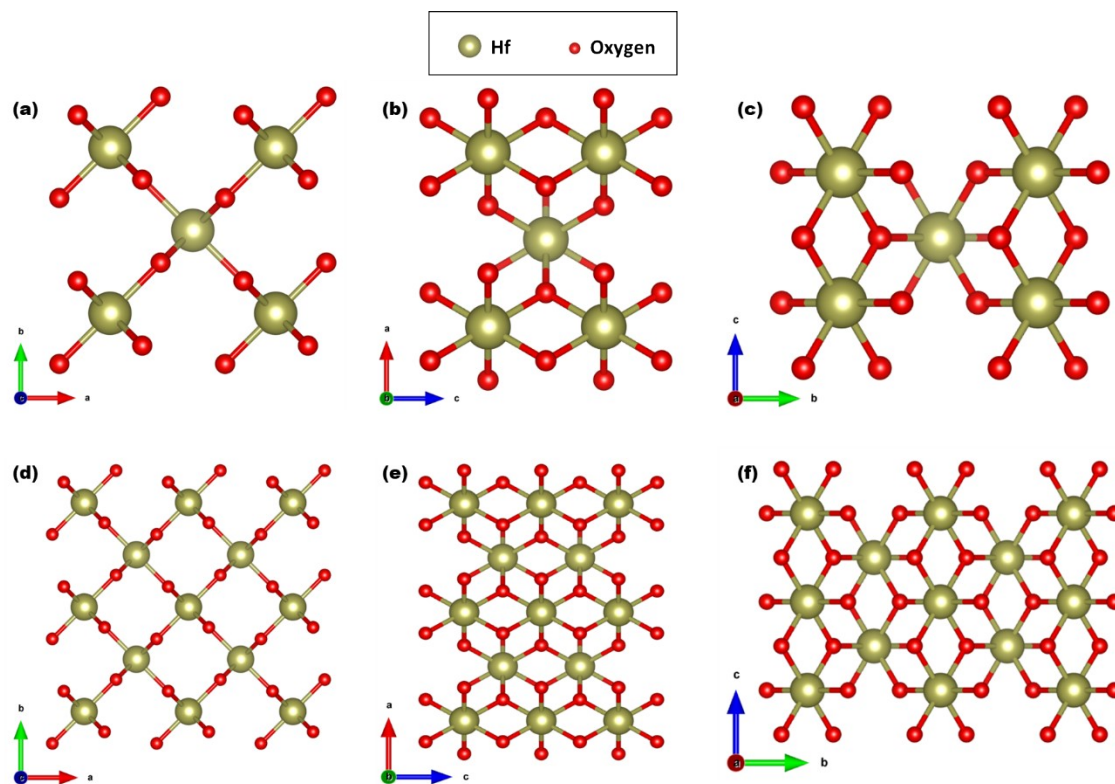

**Fig. S1** Figure presenting the (a-c) unit cell of the host material (tetragonal-HfO<sub>2</sub>, mp-776532), and the pristine 2x2x2 supercell structure. For clarification purposes, the Hf and the O-ions were indicated by golden and red, respectively.

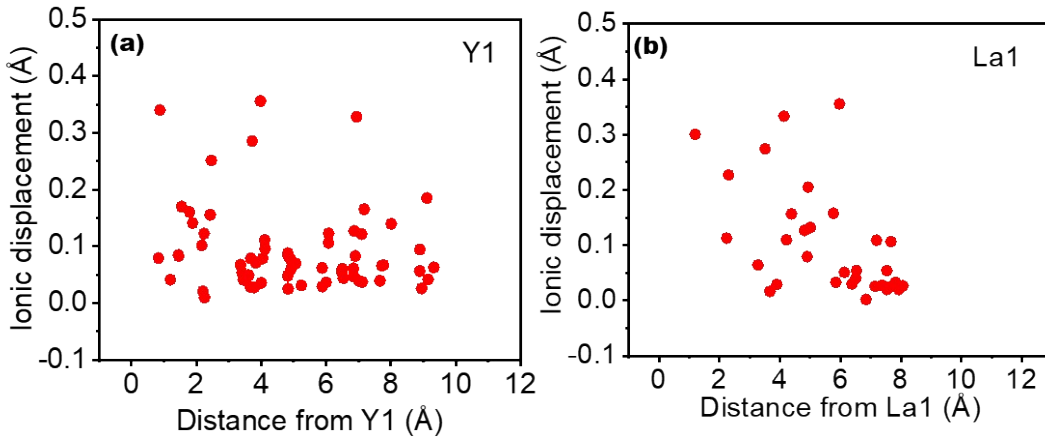

**Fig. S2** DFT-based first principal calculations of local defects structure in bulk with 2x2x2 supercell structure, where Y-ions and La-ions were doped as a defect. Ionic displacements relative to pure  $\text{HfO}_2$  as a function of radial distance from the selected Y1-ion (a) and La1-ion (b) as a defect lies within  $\sim 11$  Å from corresponding defects.

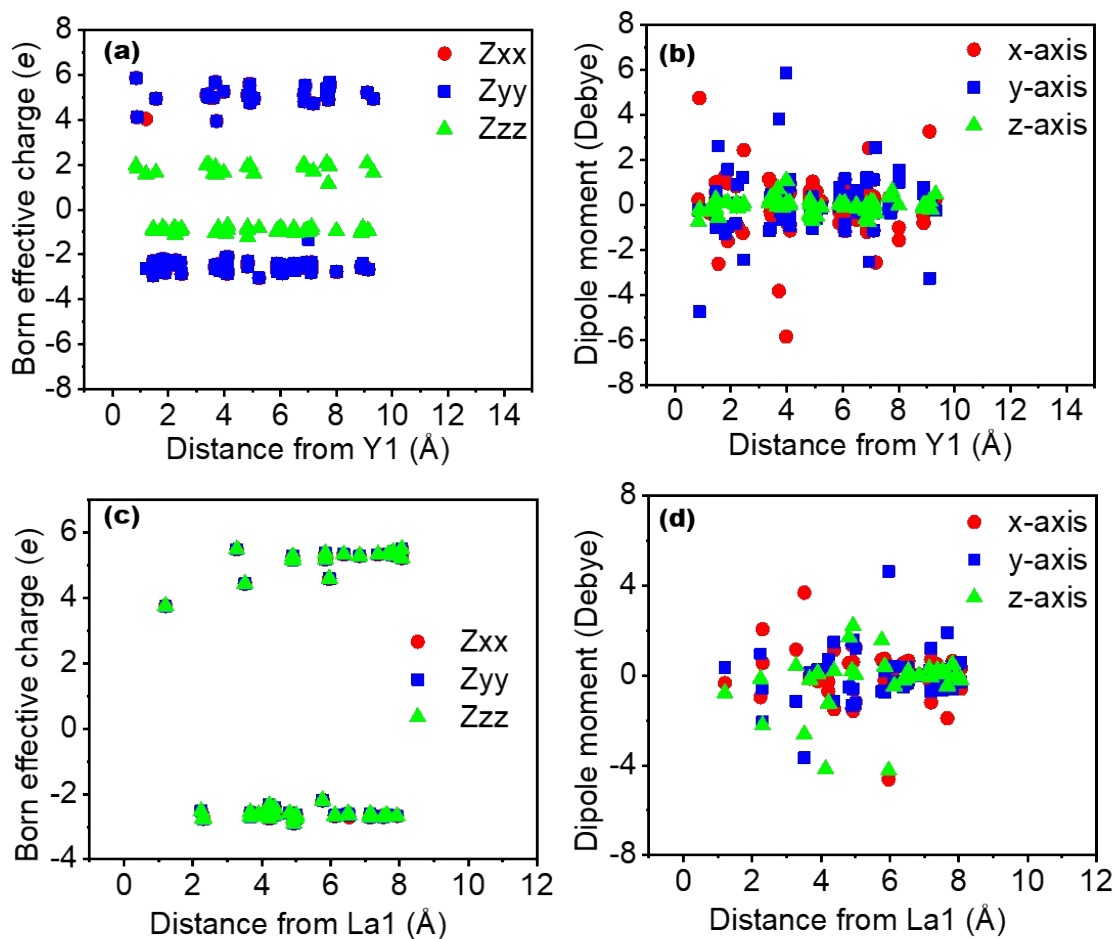

**Fig. S3** Born-effective charges (a and c) and Dipole moment (b and d) vs distance from defect (only Y1 and La1 was taken into consideration) were also calculated based on Density Functional Perturbation Theory (DFPT) calculations.

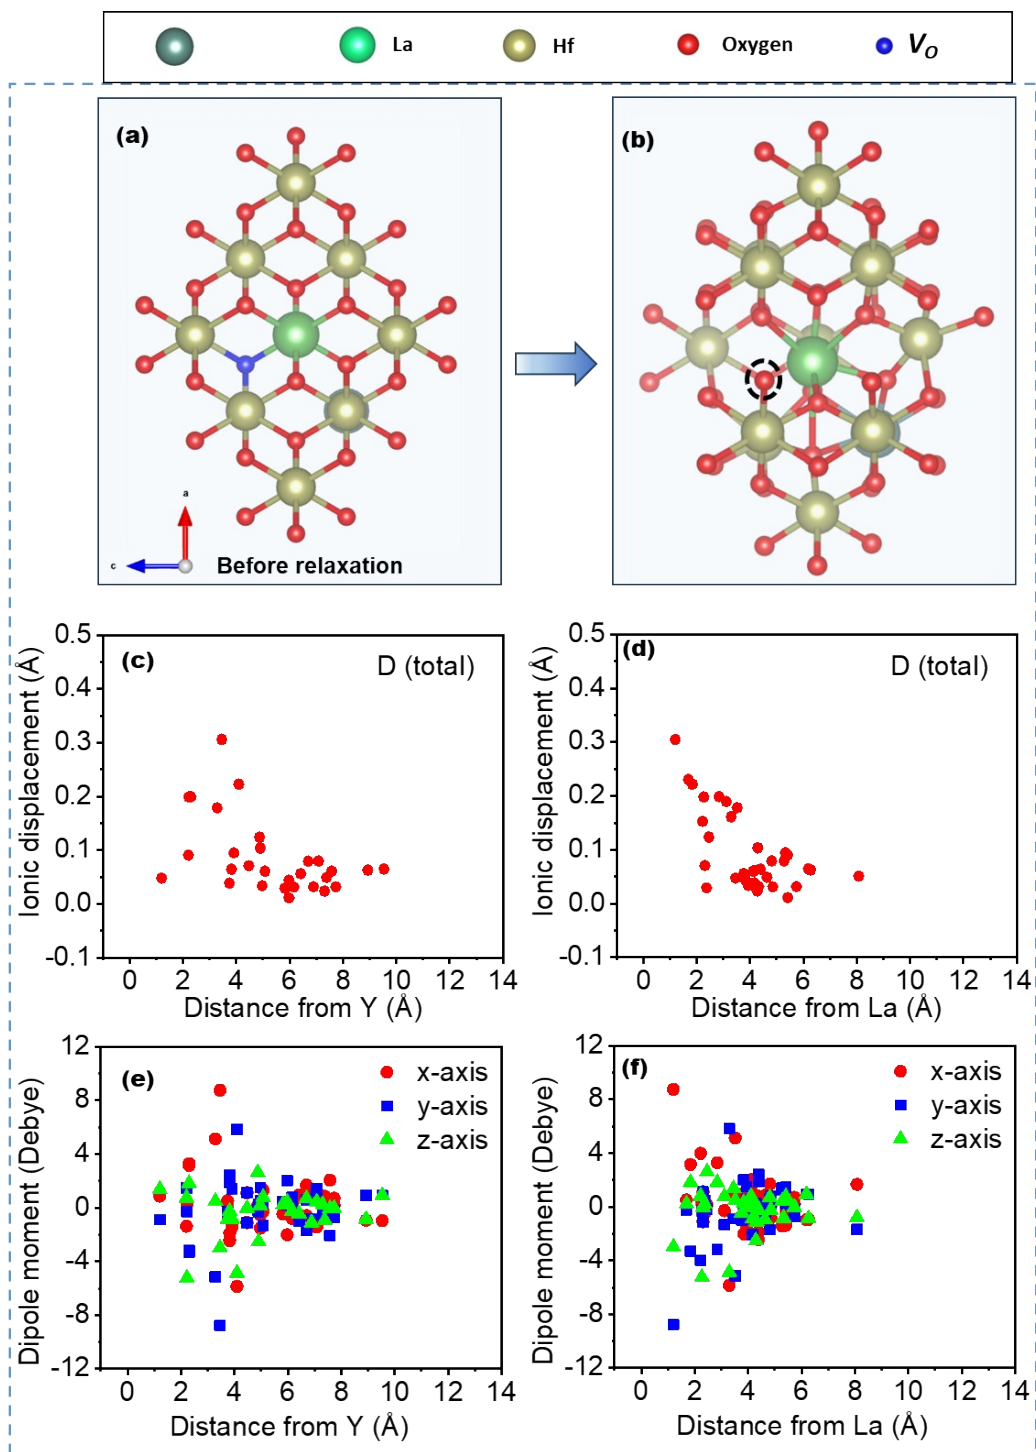

**Figure S4** DFT-based first principal calculations of local defects structure, where Y-ions and La-ions were co-doped as a defect in HfO<sub>2</sub>, based on the defect structure presented in Figure 5c. (a) the structure before relaxation and the (b) the dopant-induced defect structures showing significant

ionic displacements were presented. Ionic displacement as a function of radial distance from the selected dopant (c) Y and (d) La as a defect lies within  $\sim 8$  and  $10 \text{ \AA}$  from corresponding defects, respectively. (where "D" represents total ionic displacement in all directions  $(x+y+z)$ ). The calculated Dipole moment vs distance from defect (e) Y and (f) La were also presented.

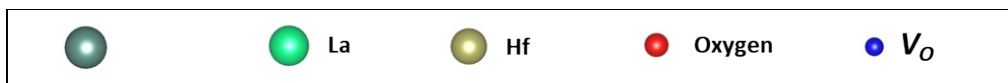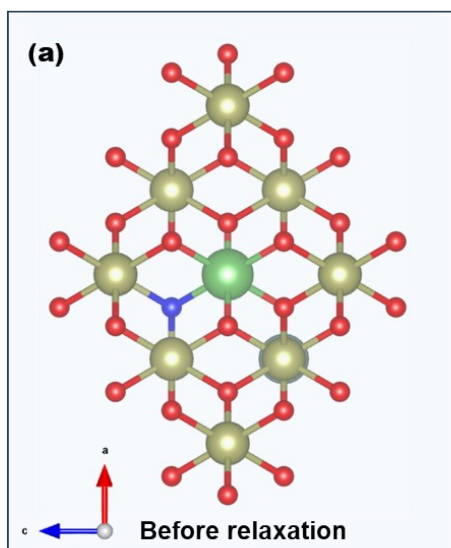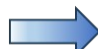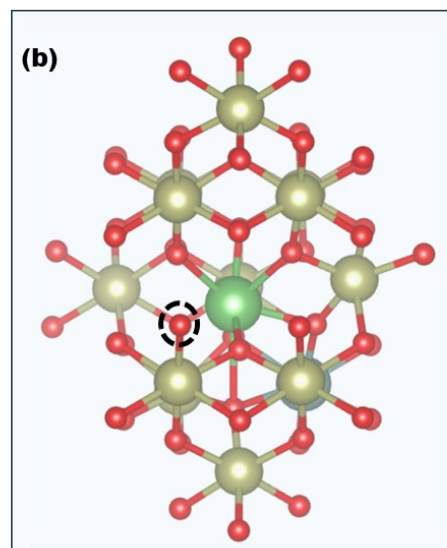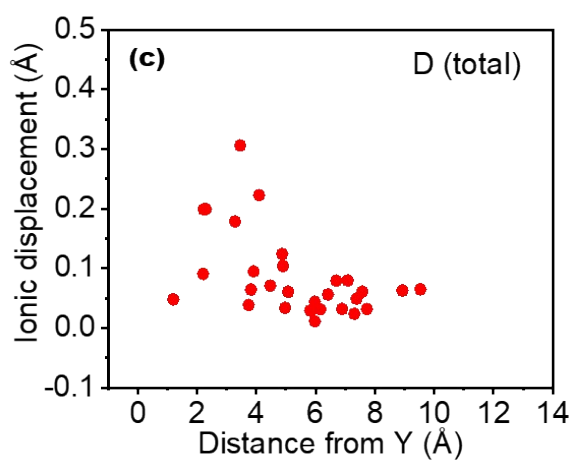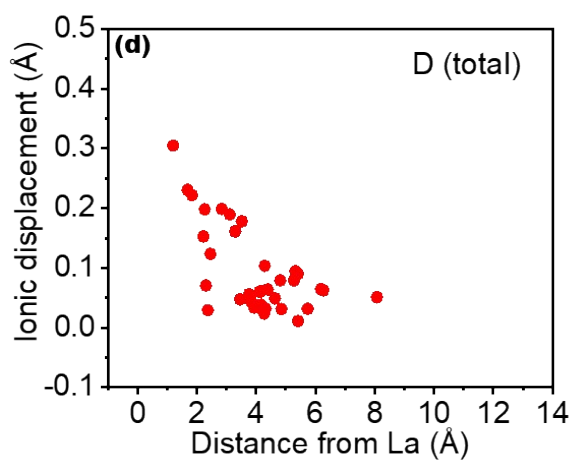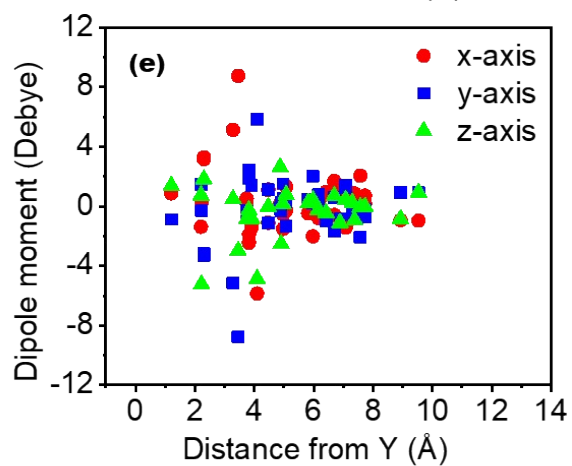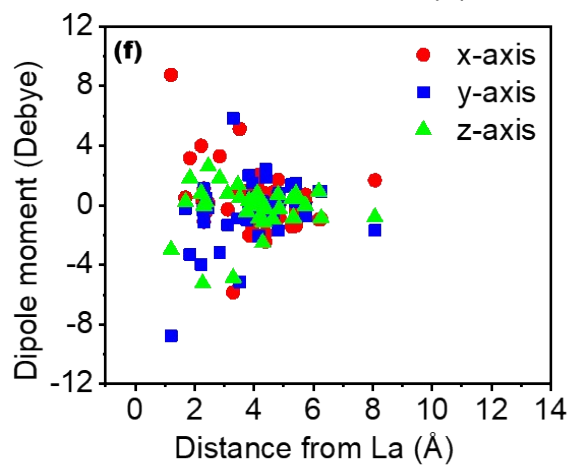

**Figure S5** DFT-based first principal calculations of local defects structure, where Y-ions and La-ions were co-doped as a defect in HfO<sub>2</sub>, based on the defect structure presented in Figure 5c. (a) the structure before relaxation and the (b) the dopant-induced defect structures showing significant ionic displacements were presented. Ionic displacement as a function of radial distance from the selected dopant (c) Y and (d) La as a defect lies within ~8 and 10 Å from corresponding defects, respectively (where "D" represents total ionic displacement in all directions ( $x+y+z$ )). The calculated Dipole moment vs distance from defect (e) Y and (f) La were also presented.
